# Supplementary material for: The biorelevant concentration of Tween 80 solution is a simple alternative medium to simulated fasted state intestinal fluid
Source: Royal Society of Chemistry journal article supplement (doi:10.1039/c5ra17674c), 2015-01-01
Supplement: c5ra17674c1.pdf [file c5ra17674c1.pdf]

## Supplementary Information

### **The biorelevant concentration of Tween 80 solution is a simple alternative medium to the simulated fasted state intestinal fluid**

Bin Yang,<sup>a</sup> Chunnuan Wu,<sup>b</sup> Bin Ji,<sup>c</sup> Xiaoyu Ai,<sup>d</sup> Xiao Kuang,<sup>a</sup> Mingrui Wu,<sup>a</sup> Mengchi Sun,<sup>a</sup> Cong Luo,<sup>a</sup> Zhonggui He<sup>a</sup> and Jin Sun <sup>\*ae</sup>

<sup>a</sup>Department of Pharmaceutics, School of Pharmacy, Shenyang Pharmaceutical University, China

<sup>b</sup>Department of Pharmacy, Tianjin Medical University Cancer Institute and Hospital, China

<sup>c</sup>Department of Pharmaceutical Analysis, School of Pharmacy, Shenyang Pharmaceutical University, China

<sup>d</sup>College of Pharmacy, Nankai University, China

<sup>e</sup>Municipal Key Laboratory of Biopharmaceutics, School of Pharmacy, Shenyang Pharmaceutical University, China

Table S1 Experimental equilibrium solubility data of model drugs in FaSSIF and SDS solutions.

| compound       | Equilibrium solubility ( $\mu\text{g/mL}$ ) |                 |                 |                 |                 |                  |
|----------------|---------------------------------------------|-----------------|-----------------|-----------------|-----------------|------------------|
|                | FaSSIF                                      | 0.05%SDS        | 0.07%SDS        | 0.10%SDS        | 0.30%SDS        | 0.50%SDS         |
| Lacidipine     | 4.56 $\pm$ 0.11                             | 2.43 $\pm$ 0.01 | 4.24 $\pm$ 0.05 | 6.87 $\pm$ 0.14 | 28.5 $\pm$ 0.09 | 61.0 $\pm$ 0.18  |
| Carbamazepine  | 192 $\pm$ 3.06                              | 216 $\pm$ 7.09  | 218 $\pm$ 4.65  | 310 $\pm$ 5.44  | 7170 $\pm$ 63.6 | 9604 $\pm$ 229   |
| Spironolactone | 36.8 $\pm$ 0.26                             | 71.2 $\pm$ 1.21 | 92.8 $\pm$ 39.0 | 130 $\pm$ 0.46  | 457 $\pm$ 2.12  | 598 $\pm$ 6.07   |
| Glimepiride    | 2.38 $\pm$ 0.03                             | 3.67 $\pm$ 0.02 | 4.74 $\pm$ 0.05 | 6.26 $\pm$ 0.08 | 18.8 $\pm$ 0.03 | 31.32 $\pm$ 0.06 |
| Indomethacin   | 788 $\pm$ 3.62                              | 679 $\pm$ 18.1  | 708 $\pm$ 7.29  | 791 $\pm$ 12.0  | 1135 $\pm$ 11.8 | 1167 $\pm$ 12.5  |
| Carvedilol     | 76.5 $\pm$ 9.03                             | 12.1 $\pm$ 0.57 | 9.04 $\pm$ 2.78 | 8.03 $\pm$ 1.26 | 173 $\pm$ 1.48  | 461 $\pm$ 4.99   |
| Itraconazole   | 0.11 $\pm$ 0.03                             | 3.16 $\pm$ 0.03 | 5.09 $\pm$ 1.35 | 8.16 $\pm$ 0.33 | 26.8 $\pm$ 0.24 | 32.9 $\pm$ 0.23  |

Table S2. Experimental equilibrium solubility data of model drugs in FaSSIF and Tween 80 solutions .

| Compound       | Equilibrium solubility ( $\mu\text{g/mL}$ ) |                   |                   |                   |                   |                   |                   |                   |
|----------------|---------------------------------------------|-------------------|-------------------|-------------------|-------------------|-------------------|-------------------|-------------------|
|                | FaSSIF                                      | 0.01%<br>Tween 80 | 0.03%<br>Tween 80 | 0.05%<br>Tween 80 | 0.07%<br>Tween 80 | 0.10%<br>Tween 80 | 0.20%<br>Tween 80 | 0.30%<br>Tween 80 |
| Lacidipine     | 4.56 $\pm$ 0.11                             | 0.43 $\pm$ 0.00   | 1.37 $\pm$ 0.02   | 2.28 $\pm$ 0.01   | 3.19 $\pm$ 0.02   | 4.59 $\pm$ 0.03   | 9.21 $\pm$ 0.04   | 14.1 $\pm$ 0.08   |
| Carbamazepine  | 192 $\pm$ 3.06                              | 162 $\pm$ 4.56    | 173 $\pm$ 2.83    | 173 $\pm$ 11.5    | 179 $\pm$ 0.76    | 176 $\pm$ 3.00    | 191 $\pm$ 1.85    | 206 $\pm$ 0.93    |
| Spironolactone | 36.8 $\pm$ 1.35                             | 28.0 $\pm$ 0.27   | 29.1 $\pm$ 0.81   | 30.8 $\pm$ 0.48   | 32.4 $\pm$ 0.19   | 36.6 $\pm$ 0.46   | 41.8 $\pm$ 0.61   | 51.5 $\pm$ 0.19   |
| Glimepiride    | 2.38 $\pm$ 0.03                             | 2.07 $\pm$ 0.02   | 1.96 $\pm$ 0.10   | 2.02 $\pm$ 0.02   | 2.48 $\pm$ 0.08   | 2.31 $\pm$ 0.03   | 2.54 $\pm$ 0.08   | 2.96 $\pm$ 0.02   |
| Indomethacin   | 788 $\pm$ 3.62                              | 593 $\pm$ 34.0    | 686 $\pm$ 3.10    | 700 $\pm$ 4.75    | 758 $\pm$ 6.28    | 778 $\pm$ 3.23    | 840 $\pm$ 10.9    | 925 $\pm$ 28.6    |
| Carvedilol     | 76.5 $\pm$ 9.0                              | 33.2 $\pm$ 0.31   | 39.6 $\pm$ 0.25   | 48.6 $\pm$ 0.70   | 54.5 $\pm$ 0.11   | 67.6 $\pm$ 0.24   | 117 $\pm$ 0.91    | 167 $\pm$ 1.67    |
| Itraconazole   | 0.11 $\pm$ 0.03                             | 0.00              | 0.02 $\pm$ 0.02   | 0.07 $\pm$ 0.03   | 0.15 $\pm$ 0.03   | 0.28 $\pm$ 0.02   | 0.50 $\pm$ 0.02   | 0.80 $\pm$ 0.01   |

Table S3 Composition of blank FaSSIF, FaSSIF, series of Tween 80 and SDS solutions.

| Composition                      | Blank FaSSIF | FaSSIF  | SDS         | Tween 80    |
|----------------------------------|--------------|---------|-------------|-------------|
| Sodium taurocholate              | —            | 3 mM    | —           | —           |
| Lecithin                         | —            | 0.75 mM | —           | —           |
| NaH <sub>2</sub> PO <sub>4</sub> | 1.719 g      | 1.719 g | 1.719 g     | 1.719 g     |
| NaCl                             | 3.093 g      | 3.093 g | 3.093 g     | 3.093 g     |
| NaOH                             | 0.174 g      | 0.174 g | 0.174 g     | 0.174 g     |
| Tween 80                         | —            | —       | —           | 0.05~1.50 g |
| SDS                              | —            | —       | 0.25~2.50 g | —           |
| pH                               | 6.5          | 6.5     | 6.5         | 6.5         |
| Deionized water                  | 500 ml       | 500 ml  | 500 ml      | 500 ml      |

Table S4 The chromatographic condition used in solubility and dissolution experiments.

| Drug           | Column                                                                                  | Mobile Phase                                                                                                                | Flow rate (mL/min) | Detection wavelength(nm) |
|----------------|-----------------------------------------------------------------------------------------|-----------------------------------------------------------------------------------------------------------------------------|--------------------|--------------------------|
| Lacidipine     | ECOSIL® C18, 5 µm, 4.6 × 250 mm (Guangzhou Lubex Biological Technology Co. Ltd., China) | methanol-water (85:15, v/v)                                                                                                 | 1.0                | 284                      |
| Carbamazepine  | Zorbax SB-CN, 5 µm, 4.6 × 250 mm (Agilent Technologies Inc., America)                   | a 1000 mL mixture of water, methanol, and tetrahydrofuran (85:12:3), add 0.22 mL of formic acid and 0.5 mL of triethylamine | 2.0                | 230                      |
| Spironolactone | Thermo C18, 5 µm, 4.6 × 250 mm (Thermo Fisher Scientific.)                              | Acetonitrile-water (70:30, v/v)                                                                                             | 1.0                | 238                      |
| Glimepiride    | ECOSIL® C18, 5 µm, 4.6 × 250 mm (Guangzhou Lubex Biological Technology Co. Ltd., China) | methanol-0.01M ammonium dihydrogen phosphate solution (pH 3.5) (70:30, v/v)                                                 | 1.0                | 228                      |
| Indomethacin   | COSMOSIL C18, 5µm, 4.6 × 150 mm (NACALAI TESQUE, INC.)                                  | Acetonitrile-0.1M ethanoicacid solution (50:50, v/v)                                                                        | 1.0                | 228                      |
| Carvedilol     | ECOSIL® C18, 5 µm, 4.6 × 250 mm (Guangzhou Lubex Biological Technology Co. Ltd., China) | Acetonitrile-0.02M potassium dihydrogen phosphate solution (pH 3.5) (65:35, v/v)                                            | 1.0                | 241                      |
| Itraconazole   | Phenomenex C18, 5 µm, 4.6 × 250 mm (Phenomenex Technology Inc.)                         | Acetonitrile-0.05% Diethanolamine solution (60:40, v/v)                                                                     | 1.0                | 261                      |
